# Supplementary material
Source: PubMed Central journal article supplement (PMC6624852)
Supplement: NIHMS1519064-supplement-2.pdf [file NIHMS1519064-supplement-2.pdf]

## **Supplemental Information**

### **A License to Switch: Hemizyosity Enables a Mutational Transition**

### **Governing Fungal Virulence and Commensalism**

Shen-Huan Liang, Matthew Z. Anderson, Matthew P. Hidakawa, Joshua M. Wang, Corey Frazer,  
Leenah M. Alaalm, Gregory J. Thomson, Iuliana V. Ene, and Richard J. Bennett

**Table S1. RNA-sequencing data for *C. albicans* cells in different cell states and genetic backgrounds. Related to Figure 3.** TPM values, differentially expressed genes and GO term analysis are listed in separate sheets. \* indicates cells derived from *efg1Δ/EFG1* white state.

**Table S2. Oligos used in this study. Related to STAR Methods.**

| Oligo | Sequence                                                                                                 |
|-------|----------------------------------------------------------------------------------------------------------|
| 11    | CTCAACCATAGCAATCATGG                                                                                     |
| 12    | GCGAAAAAGTGGGCACTAAG                                                                                     |
| 25    | GAATATGAACCCATGCCAATGAC                                                                                  |
| 26    | CCATATGTTGGATGAAGATACGG                                                                                  |
| 397   | GGGACATTACAATTGTCTCTC                                                                                    |
| 398   | GAATCACAGAGTCTAACCAC                                                                                     |
| 690   | ATTAGATACGTTGGTGGTTC                                                                                     |
| 691   | AACACAACCTGCACAATCTGG                                                                                    |
| 692   | AGAATTCCTCACTTTGTCTG                                                                                     |
| 693   | AAACTTTGAACCCGGCTGCG                                                                                     |
| 819   | CATTGATCCGATTTTCACAACG                                                                                   |
| 828   | CCTACAACAGATATCAGTATCC                                                                                   |
| 1473  | AACCTTCTGGCATGGCAGAC                                                                                     |
| 1838  | CGGCCGGGTACCATTGCCCTACCCATCTACTCGC                                                                       |
| 1839  | GGCCGCGGGCCCTGTCAATGGATTTGGGAGAAG                                                                        |
| 1840  | GGGGAAGCAAAACTAAGAAAAGTAG                                                                                |
| 2251  | ACATCCAGCCAACCCACTTA                                                                                     |
| 2252  | CACGGCGCGCCTAGCAGCGGGCAGTTGTTTGTCTGGGGCATA                                                               |
| 2253  | GTCAGCGGCCGCATCCCTGCTGACTCAAGGTTCAAGTTCAACC                                                              |
| 2254  | CCTTCCGCATTAGACGCTTA                                                                                     |
| 2284  | TTGCCCTACCCATCTACTCG                                                                                     |
| 2285  | CATCACCTGTAACCTCGTGTCG                                                                                   |
| 2286  | TTGCTGCTGTTTGTGTTTG                                                                                      |
| 2291  | AACAGACTGGACAGACAGCAGGAC                                                                                 |
| 2292  | TAGTAGTAGCAGCAGCAACGGGTG                                                                                 |
| 2381  | GCCGGCGTCGACCAACTCAGAGCACGCTAGAC                                                                         |
| 2609  | ACCCCAAATCCACCACAGG                                                                                      |
| 2610  | ACATGACGGTCGAAGATGGT                                                                                     |
| 2909  | GCAGGTGGGCCCATGTCAACGTATTCTATACCC                                                                        |
| 2910  | GGTGGTGGATCCCGTTCATGTCAATGGATTTG                                                                         |
| 2933  | CTCGTGGTCTGATTCTGGT                                                                                      |
| 3055  | CCCAGATGCGAAGTTAAGTGCGCAG                                                                                |
| 3056  | AAAAGGCCTGATAAGGAGAGATCCATTAAGAGCA                                                                       |
| 3265  | GACGTCTCTGTAGATGGGT                                                                                      |
| 3266  | AAGTCGGTGCCCAAGTAATG                                                                                     |
| 3269  | GGAACCTCCTGCGGTCATTA                                                                                     |
| 3270  | CGGTGCATCGGTAAACGATT                                                                                     |
| 3429  | TTGTACTCTTCTGGTAGAAC                                                                                     |
| 3430  | GTTTGGTCAATACCAGCAGC                                                                                     |
| 3497  | ACCAGGAATCAGACCAG                                                                                        |
| 3499  | GGCAACAGTGCTAGCTGAT                                                                                      |
| 3685  | ATTTGTCCCAAATAGTATAAATTCGTTTCATGTCAATGGATTTGGGAGAAGATTATGATCTATACTATTT<br>CAGGGAACAAAAGCTGGAGCT          |
| 3687  | ACAAATGGTCAAGGCGTCATCATATCATTATTATCTATTTGTTGCGGCAATATTACAATTCCTTCAT<br>GAGGGAACAAAAGCTGGAGCT             |
| 3819  | TACTAATGGAACATTGGTTGCTGCTGGAACAGATGACGCAGTTGGAAATTCTTCTGGGTGCTATTACA<br>CCGGTACTCGGATCCCCGGGTTAATTAACGGT |
| 3821  | TCAAGGTTCAAGTTACCCCTCACCCCAACAACATCAAGCTAATCAATCAGCTAGCACTGTTGCCAAAGA<br>AGAAAAGCGGATCCCCGGGTTAATTAACGGT |

4104 GGAGCGGGGCCACATCCAGCCAACCCACTTA  
4105 GGAGCGCTCGAGGCAGTTGTTTGGTGGGGCATA  
4106 GGAGCGCCGCGGTGACTCAAGGTTCAAGTTACC  
4107 GGAGCGGAGCTCCCTTCCGCATTAGACGCTTA  
4114 TGTGGTAGGGGAGGCC  
4115 AGGTGTGTACATCAAGGTGG  
4290 GGCCCAAATGACACGTGATAGAAGAGATGGG  
4291 CCCATCTCTTCTATCACGTGTCATTTGGGCC  
4476 ACCAACCAACCCTTAACCCA  
4480 TGCCCAAATGTCTTCCGAT  
4481 GAGGTAAGGGTTCAAGTCCA  
4483 TTCGATATCAGTGAGCCAAC  
4484 CCAAATCCAAAGCCTGTTGA  
4532 GGACCGGGGCCCTTTTCTTCTTTGGCAACAGTGC  
4577 TCTCGTTTGCATGCGAGATT  
4578 CCTATCTCCAAGCGTCAGAT  
4680 GATAGACTCTGTGCATTGTC  
4681 ACCAACCAAGTCTATTTGAT  
4716 GGCGCCCCGCGGGTGTGTAAGTCATTGTCTTTCC  
4864 ACCAAAAAGAATCAACTTATACATTACTAATCTATTCATCTTATTCTCATCACACACGCATATAACAAGCA  
CTACACATAACCAGTGTGATGGATATCTGC  
4865 CACGGATAGATCTGTTAGAGATGTGGTGGATTGGTATTTCTTCTGTGATTCACCGAAAGTATTATCAA  
CTAAGAAGGGAGCTCGGATCCACTAGTAACG  
4928 TCCTAGTTCACCACATAAATACTCT  
4929 GTCTCACAAGGGTCAAGGT  
4930 CACCAACAACAACCAGAGTGA  
4945 ACAGAATTAGTTTGGAAGTCAAGCA  
4946 TGGTTGTTACGTAATTGCCT  
4992 ACCGAGATATGATACAGGTTGC  
4993 TCCGATTCCAAGTGTGGAG

**Table S3. *C. albicans* strains used in this study. Related to STAR Methods.**

| Strains | MTL | Genotype <sup>a</sup>                                                                             | Background | Phenotype <sup>b</sup> | Source                       |
|---------|-----|---------------------------------------------------------------------------------------------------|------------|------------------------|------------------------------|
| SN87    | a/α | <i>his1Δ/his1Δ leu2Δ/leu2Δ</i> *                                                                  | SC5314     | WH                     | (Noble and Johnson, 2005)    |
| TF156   | a/α | <i>arg4Δ/arg4Δ his1Δ/his1Δ leu2Δ/leu2Δ efg1Δ::C.d. HIS1/efg1Δ::C.m LEU2</i>                       | SC5314     | GR                     | (Homann et al., 2009)        |
| RBY717  | a/a | Wildtype*                                                                                         | SC5314     | WH/OP                  | (Bennett et al., 2003)       |
| RBY1132 | a/a | <i>arg4Δ/arg4Δ his1Δ/his1Δ leu2Δ/leu2Δ</i> *                                                      | SC5314     | WH/OP                  | (Sherwood and Bennett, 2008) |
| RBY1177 | a/a | <i>his1Δ/his1Δ::HIS1 leu2Δ/leu2Δ</i> *                                                            | SC5314     | WH/OP                  | (Bennett and Johnson, 2006)  |
| CAY701  | a/α | Wildtype P37037                                                                                   | P37037     | WH                     | (Wu et al., 2007)            |
| CAY709  | α/α | Wildtype GC75                                                                                     | GC75       | WH                     | (Wu et al., 2007)            |
| CAY710  | a/a | Wildtype P94015                                                                                   | P94015     | GR/OP                  | (Wu et al., 2007)            |
| CAY711  | a/α | Wildtype P75063                                                                                   | P75063     | WH                     | (Wu et al., 2007)            |
| CAY712  | a/α | Wildtype P76055                                                                                   | P76055     | WH                     | (Wu et al., 2007)            |
| CAY714  | α/α | Wildtype P57072                                                                                   | P57072     | WH                     | (Wu et al., 2007)            |
| CAY716  | a/a | Wildtype P37005                                                                                   | P37005     | WH                     | (Wu et al., 2007)            |
| CAY6911 | a/a | <i>arg4Δ/arg4Δ his1Δ/his1Δ leu2Δ/leu2Δ efg1Δ::C.d. HIS1/efg1Δ::C.m LEU2::EFG1-SAT1-FLIP</i> *     | SC5314     | WH                     | This study                   |
| CAY6970 | a/a | <i>arg4Δ/arg4Δ his1Δ/his1Δ leu2Δ/leu2Δ efg1Δ::C.d. HIS1/EFG1</i> *                                | SC5314     | WH                     | This study                   |
| CAY6973 | a/a | <i>arg4Δ/arg4Δ his1Δ/his1Δ leu2Δ/leu2Δ efg1Δ::C.d. HIS1/EFG1</i> *                                | SC5314     | WH                     | This study                   |
| CAY6976 | a/a | <i>arg4Δ/arg4Δ his1Δ/his1Δ leu2Δ/leu2Δ efg1Δ::C.d. HIS1/EFG1</i> *                                | SC5314     | WH                     | This study                   |
| CAY6977 | a/a | <i>arg4Δ/arg4Δ his1Δ/his1Δ leu2Δ/leu2Δ efg1Δ::C.d. HIS1/efg1Δ::C.m LEU2</i> *                     | SC5314     | GR/OP                  | This study                   |
| CAY7022 | a/a | <i>arg4Δ/arg4Δ his1Δ/his1Δ leu2Δ/leu2Δ efg1Δ::C.d. HIS1/efg1<sup>#</sup>*</i>                     | SC5314     | GR                     | This study                   |
| CAY7023 | a/a | <i>arg4Δ/arg4Δ his1Δ/his1Δ leu2Δ/leu2Δ efg1Δ::C.d. HIS1/efg1<sup>#</sup>*</i>                     | SC5314     | OP                     | This study                   |
| CAY7064 | a/α | <i>his1Δ/his1Δ leu2Δ/leu2Δ efg1Δ::C.d. HIS1/EFG1</i> *                                            | SC5314     | WH                     | This study                   |
| CAY7065 | a/α | <i>his1Δ/his1Δ leu2Δ/leu2Δ efg1Δ::C.d. HIS1/efg1<sup>#</sup>*</i>                                 | SC5314     | GR                     | This study                   |
| CAY7286 | a/a | <i>arg4Δ/arg4Δ his1Δ/his1Δ WOR1/WOR1-GFP-SAT1-FLIP</i> *                                          | SC5314     | WH/OP                  | This study                   |
| CAY7292 | a/a | <i>arg4Δ/arg4Δ his1Δ/his1Δ EFG1/EFG1-GFP-SAT1-FLIP</i> *                                          | SC5314     | WH/OP                  | This study                   |
| CAY7364 | a/α | Wildtype HJ039                                                                                    | HJ039      | GR                     | (Tao et al., 2014)           |
| CAY7365 | a/α | Wildtype HJ071                                                                                    | HJ071      | GR                     | (Tao et al., 2014)           |
| CAY7369 | a/α | Wildtype BJ1097                                                                                   | BJ1097     | WH                     | (Tao et al., 2014)           |
| CAY7370 | a/α | <i>EFG1<sup>Q61*Q61*#</sup></i>                                                                   | BJ1097     | GR                     | (Tao et al., 2014)           |
| CAY7637 | a/α | Wildtype 945                                                                                      | 945        | GR                     | (Perea et al., 2001)         |
| CAY7638 | a/α | Wildtype 1619                                                                                     | 1619       | WH                     | (Perea et al., 2001)         |
| CAY7639 | a/α | Wildtype 2823                                                                                     | 2823       | WH                     | (Perea et al., 2001)         |
| CAY7640 | a/α | Wildtype 4018                                                                                     | 4018       | WH                     | (Perea et al., 2001)         |
| CAY7683 | a/α | <i>EFG1/EFG1::EFG1<sub>SC5314</sub></i>                                                           | P75063     | WH                     | This study                   |
| CAY7768 | a/α | <i>his1Δ/his1Δ leu2Δ/leu2Δ efg1Δ::C.d. HIS1/EFG1 neut5Δ::NAT1/NEUT5L</i> *                        | SC5314     | WH                     | This study                   |
| CAY7769 | a/α | <i>his1Δ/his1Δ leu2Δ/leu2Δ efg1Δ::C.d. HIS1/efg1 neut5Δ::NAT1/NEUT5L<sup>#</sup>*</i>             | SC5314     | GR                     | This study                   |
| CAY7770 | a/α | <i>his1Δ/his1Δ leu2Δ/leu2Δ neut5Δ::NAT1/NEUT5L</i> *                                              | SC5314     | WH                     | This study                   |
| CAY7868 | a/a | <i>arg4Δ/arg4Δ his1Δ/his1Δ leu2Δ/leu2Δ efg1Δ::C.d. HIS1/efg1 neut5Δ::NAT1/NEUT5L<sup>#</sup>*</i> | SC5314     | OP                     | This study                   |

|         |     |                                                                                                               |        |       |            |
|---------|-----|---------------------------------------------------------------------------------------------------------------|--------|-------|------------|
| CAY7869 | a/a | <i>arg4Δ/arg4Δ his1Δ/his1Δ leu2Δ/leu2Δ efg1Δ::C.d. HIS1/efg1 neut5Δ::NAT1/NEUT5L<sup>#</sup>*</i>             | SC5314 | GR    | This study |
| CAY8128 | a/a | <i>arg4Δ/arg4Δ his1Δ/his1Δ leu2Δ/leu2Δ efg1Δ::C.d. HIS1/EFG1-GFP-SAT1-FLIP*</i>                               | SC5314 | WH    | This study |
| CAY8131 | a/a | <i>arg4Δ/arg4Δ his1Δ/his1Δ leu2Δ/leu2Δ efg1Δ::C.d. HIS1/EFG1 WOR1/WOR1-GFP-SAT1-FLIP*</i>                     | SC5314 | WH    | This study |
| CAY8162 | a/a | <i>leu2Δ/leu2Δ EFG1/EFG1-myc-SAT1-FLIP*</i>                                                                   | SC5314 | WH/OP | This study |
| CAY8282 | a/α | <i>his1Δ/his1Δ::HIS1 leu2Δ/leu2Δ*</i>                                                                         | SC5314 | WH    | This study |
| CAY8646 | a/a | <i>arg4Δ/arg4Δ his1Δ/his1Δ leu2Δ/leu2Δ efg1Δ::C.d. HIS1/efg1Δ::C.m. LEU2::EFG1<sup>G252D</sup>-SAT1-FLIP*</i> | SC5314 | GR    | This study |
| CAY8673 | a/α | <i>efg1Δ::SAT1-FLIP/EFG1</i>                                                                                  | P76055 | WH    | This study |
| CAY8718 | α/α | <i>efg1Δ::SAT1-FLIP/EFG1</i>                                                                                  | GC75   | WH    | This study |
| CAY8721 | α/α | <i>efg1Δ::SAT1-FLIP/EFG1</i>                                                                                  | P57072 | WH    | This study |
| CAY8724 | a/a | <i>efg1Δ::SAT1-FLIP/EFG1</i>                                                                                  | P37005 | WH    | This study |
| CAY8940 | a/a | <i>leu2Δ/leu2Δ efg1Δ::SAT1-FLIP/EFG1-myc::FRT*</i>                                                            | SC5314 | WH    | This study |
| CAY9155 | a/α | <i>EFG1<sup>G252D</sup>/EFG1-GFP-SAT1</i>                                                                     | P37037 | WH    | This study |
| CAY9159 | a/α | <i>EFG1<sup>insert22</sup>/EFG1-GFP-SAT1</i>                                                                  | P75063 | WH    | This study |
| CAY9165 | a/α | <i>EFG1<sup>Q37*</sup>/EFG1-GFP-SAT1</i>                                                                      | 1619   | WH    | This study |
| CAY9195 | a/α | <i>EFG1<sup>Q61*</sup>/EFG1-GFP-SAT1</i>                                                                      | BJ1097 | WH    | This study |
| CAY9628 | a/α | <i>leu2Δ/leu2Δ his1Δ/his1Δ ade2Δ::C.d. HIS1/ADE2*</i>                                                         | SC5314 | WH    | This study |
| CAY9962 | a/a | <i>his1Δ/his1Δ::HIS1 leu2Δ/leu2Δ arg4Δ/arg4Δ*</i>                                                             | SC5314 | WH/OP | This study |

Only one representative strain was listed for each genetic and epigenetic background.

\* indicates that strains contain the genotype *ura3Δ::imm<sup>434</sup>/URA3 iro1Δ::imm<sup>434</sup>/IRO1*.

# indicates strains were derived from *EFG1<sup>+/−</sup>* white cells through *de novo* mutations

<sup>a</sup> *C.d.*, *C. dubliniensis*; *C.m.*, *C. maltosa*.

<sup>b</sup> WH, white; GR, gray; OP, opaque.

**Table S4. Set of SNP-RFLP markers used in this study. Related to STAR Methods.**

| Chr | Position (bp) | SNP | Size of the marker (bp) | Oligos    | RE     | Size of digestion products (bp) | Genetic background     | Ref                                  |
|-----|---------------|-----|-------------------------|-----------|--------|---------------------------------|------------------------|--------------------------------------|
| RL  | 679112        | T/C | 956                     | 4480/4481 | AseI   | 93/863                          | P75063, SC5314         | (Forche et al., 2009) and this study |
| RL  | 1602285       | A/G | 139                     | 3265/3266 | DdeI   | 62/77                           | SC5314                 | (Forche et al., 2009)                |
| RL  | 1686418       | C/T | 181                     | 4483/4484 | SmaI   | 138/43                          | SC5314                 | (Forche et al., 2009)                |
| RL  | 1712897       | T/C | 600                     | 4992/4993 | BclI   | 228/372                         | P75063, P37037         | This study                           |
| RL  | 1720595       | T/C | 430                     | 4945/4946 | XhoI   | 283/147                         | P37037                 | This study                           |
| RL  | 1721256       | A/G | 436                     | 4928/4929 | BstBI  | 241/195                         | P75063                 | This study                           |
| RL  | 1721280       | T/C | 436                     | 4928/4929 | AluI   | 265/171                         | P75063                 | This study                           |
| RL  | 1722874       | A/G | 906                     | 2284/2252 | PsiI   | 114/792                         | P75063, SC5314, P37037 | This study                           |
| RL  | 1723718       | G/A | 816                     | 2909/819  | NheI   | 132/684                         | 1619                   | This study                           |
| RL  | 1723738       | T/A | 816                     | 2909/819  | SphI   | 149/667                         | 1619                   | This study                           |
| RL  | 1724302       | T/C | 816                     | 2909/819  | BclI   | 712/104                         | P75063, 1619           | This study                           |
| RL  | 1724343       | G/A | 816                     | 2909/819  | XcmI   | 748/68                          | P37037                 | This study                           |
| RL  | 1724772       | T/C | 1650                    | 2909/4532 | KpnI   | 1182/468                        | 1619, P37037           | This study                           |
| RL  | 1725663       | A/G | 524                     | 4716/2285 | BstBI  | 105/419                         | P75063                 | This study                           |
| RL  | 1725946       | A/G | 524                     | 4716/2285 | BsrI   | 384/140                         | P37037                 | This study                           |
| RL  | 1726064       | T/G | 675                     | 4716/4930 | SaI    | 504/171                         | P75063                 | This study                           |
| RL  | 1727072       | T/C | 765                     | 4577/4578 | Bpu10I | 460/305                         | SC5134                 | This study                           |
| RR  | 1781488       | A/G | 187                     | 3269/3270 | DdeI   | 71/116                          | SC5314                 | (Forche et al., 2009)                |

RE, restriction enzyme

RL, left of chromosome R centromere; RR, right of chromosome R centromere.

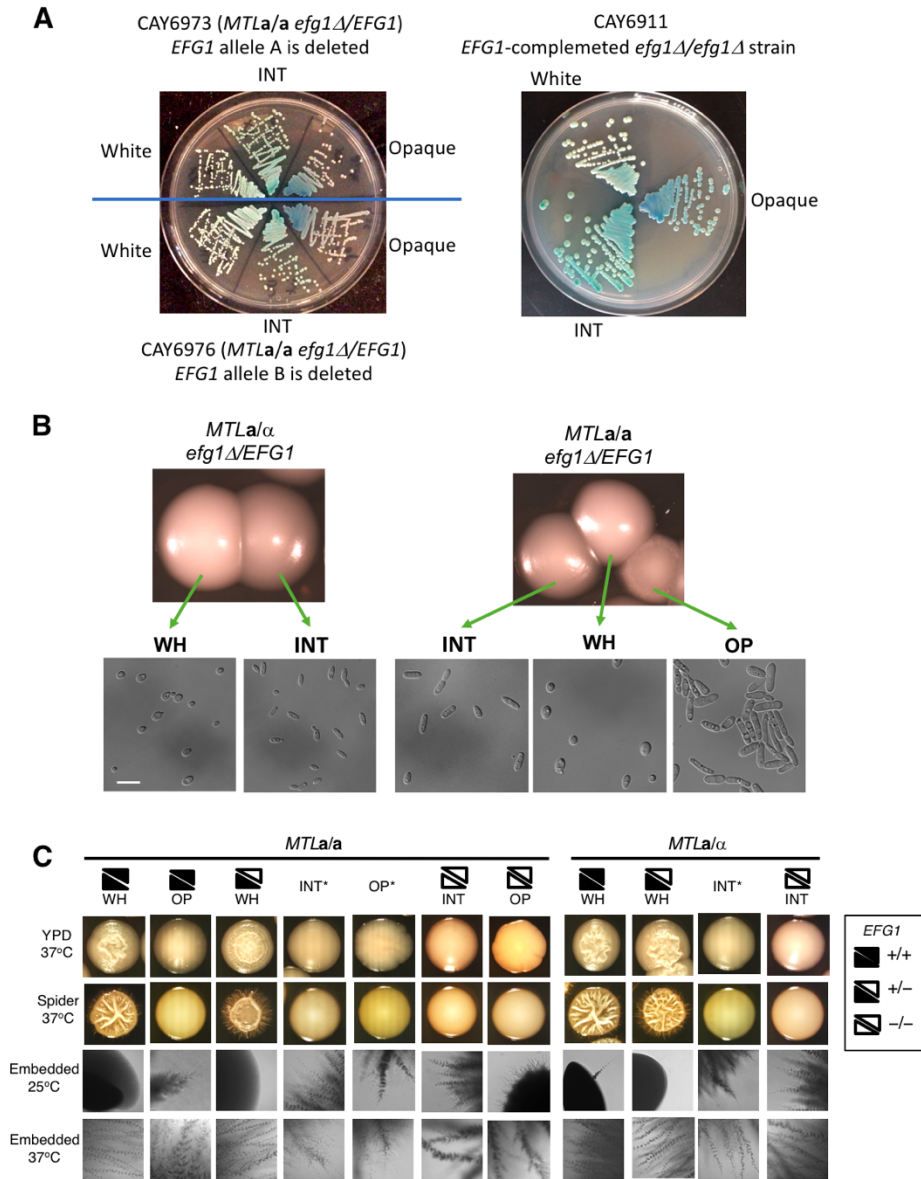

**Figure S1. Morphology of SC5314 white, INT and opaque cells. Related to Figure 1.**

(A) *C. albicans* SC5314 cells can access the ‘INT’ cell state in *EFG1* hemizygous strains. Left panel, SC5314 *MTLa/a efg1Δ/EFG1* cells exhibit white-INT-opaque transitions regardless of whether allele A (CAY6973) or allele B (CAY6976) is deleted. Right panel, SC5314 *MTLa/a efg1Δ/Δ* cells can form INT and opaque states, but re-integration of one *EFG1* allele allows cells to also form the white state. \* indicates cells originated from *efg1Δ/EFG1* white state.



(B) Morphology of white, INT and opaque cells on YPD medium. Colonies were grown on YPD for 2 days. White cells form white colonies with a smooth surface. INT colonies have a smooth surface but a darker color than white cells. In contrast, opaque cells form rougher colonies. INT and opaque cells are elongated on YPD medium, whereas white cells are oval. Opaque cells are larger than INT or white cells. Scale bar, 10  $\mu$ m. *MTLa/ $\alpha$  efg1 $\Delta$ /EFG1*; CAY7064. *MTLa/ $\alpha$  efg1 $\Delta$ /EFG1*; CAY6970. \* indicates cells derived from *efg1 $\Delta$ /EFG1* white state.

(C) Filamentation of white, INT and opaque cells. SC5314-derived cells were grown on YPD or Spider media at 37°C or embedded in YPS medium at 37°C or 22°C for 5 days. *MTLa/ $\alpha$  EFG1/EFG1*; SC5314. *MTLa/ $\alpha$  efg1 $\Delta$ /EFG1*; CAY7064. *MTLa/ $\alpha$  efg1 $\Delta$ /efg1 $\Delta$* ; TF156. *MTLa/ $\alpha$  EFG1/EFG1*; RBY717. *MTLa/ $\alpha$  efg1 $\Delta$ /EFG1*; CAY6970. *MTLa/ $\alpha$  efg1 $\Delta$ /efg1 $\Delta$* ; CAY6977. \* indicates cells generated from *efg1 $\Delta$ /EFG1* white state.



(B) CHROMagar plate and cell images show that reconstruction of the G252D mutation in SC5314 *EFGI* led to an allele that was nonfunctional when re-introduced into SC5314 *efg1Δ/Δ* cells as it did not promote cell state switching. Scale bar, 20 μm. Strains *efg1Δ/EFGI* (CAY6970) and *efg1Δ/Δ+EFGI* (CAY6911) are shown in the white state while *efg1Δ/Δ* (CAY6977) and *efg1Δ/Δ+EFGI(G252D)* (CAY8646) strains are in the INT state.

(C) An *MTLa/α EFGI<sup>+/+</sup>* strain (P76055) was locked in the white state but exhibited white-to-INT transitions upon deletion of one *EFGI* allele. *MTL* homozygous strains (P37005, GC75, and P57072) were also naturally *EFGI<sup>+/+</sup>* and formed white, INT and opaque states when one allele of *EFGI* was deleted. These experiments phenocopy our observations with *EFGI* and *MTL* mutants of SC5314 (see Figure 1 and Figure S1). P75063 is an *MTLa/α* strain that is naturally hemizygous for *EFGI* and exhibits white-to-INT transitions (see Fig. 4B). Integration of a functional SC5314 *EFGI* allele into P75063 (resulting in an *EFGI<sup>+/+</sup>* strain) blocked formation of the INT state.

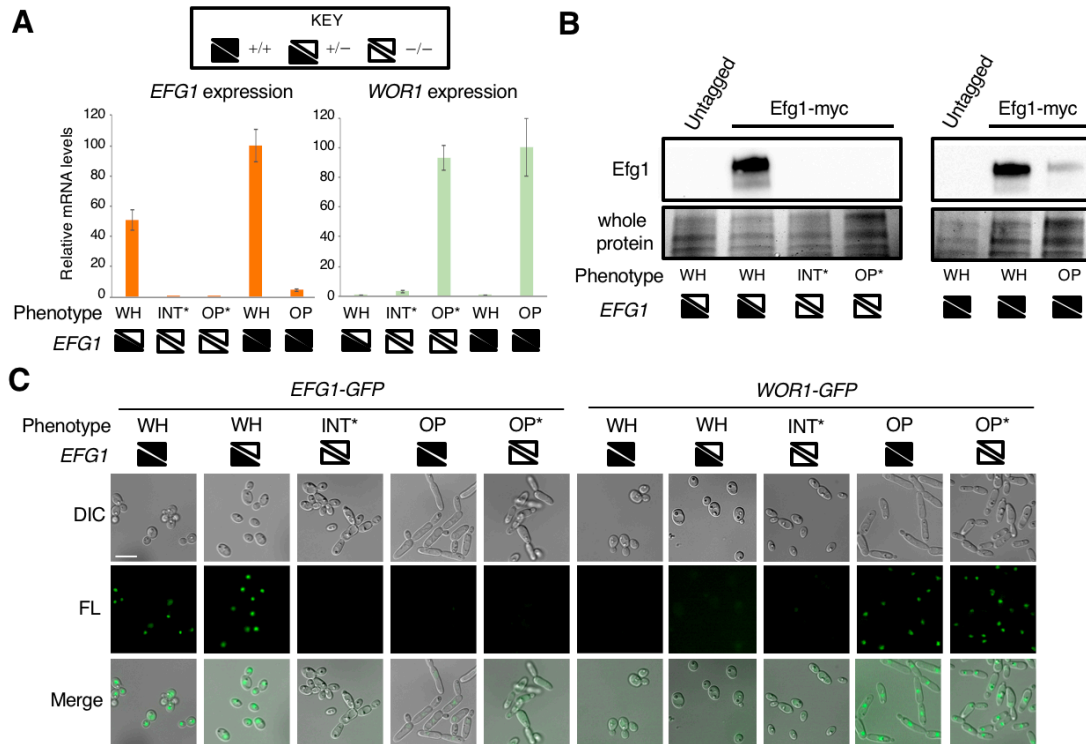

**Figure S3. Expression of *EFG1* and *WOR1* in different cell states. Related to Figure 1.**

(A) RT-PCR of *EFG1* and *WOR1* expression in different cell types (*MTLa/a* strain). Expression levels normalized to actin controls. *EFG1* levels displayed relative to those in *EFG1*<sup>+/+</sup> white cells and *WOR1* levels relative those in *EFG1*<sup>+/+</sup> opaque cells. *MTLa/a* *EFG1*<sup>+/+</sup>; RBY717. *MTLa/a* *efg1* $\Delta$ /*EFG1*; CAY6970. \* indicates cells derived from *efg1* $\Delta$ /*EFG1* white state.

(B) Top panels, western blot of Efg1-myc expression. Bottom panels, total protein. *EFG1/EFG1-myc*; CAY8162. *efg1* $\Delta$ /*EFG1-myc*; CAY8940. \* indicates cells derived from *efg1* $\Delta$ /*EFG1* white cells.

(C) Fluorescence microscopy of *MTLa/a* cells expressing Efg1-GFP or Wor1-GFP in different cell states. Exposure time and settings are constant between panels. DIC – Differential Interference Contrast. FL=GFP channel. Scale bar, 10  $\mu$ m. *EFG1/EFG1-GFP*; CAY7292. *efg1* $\Delta$ /*EFG1-GFP*; CAY8128. *EFG1/EFG1* *WOR1-GFP*; CAY7286. *efg1* $\Delta$ /*EFG1* *WOR1-GFP*; CAY8131. \* indicates cells derived from *efg1* $\Delta$ /*EFG1* white state.

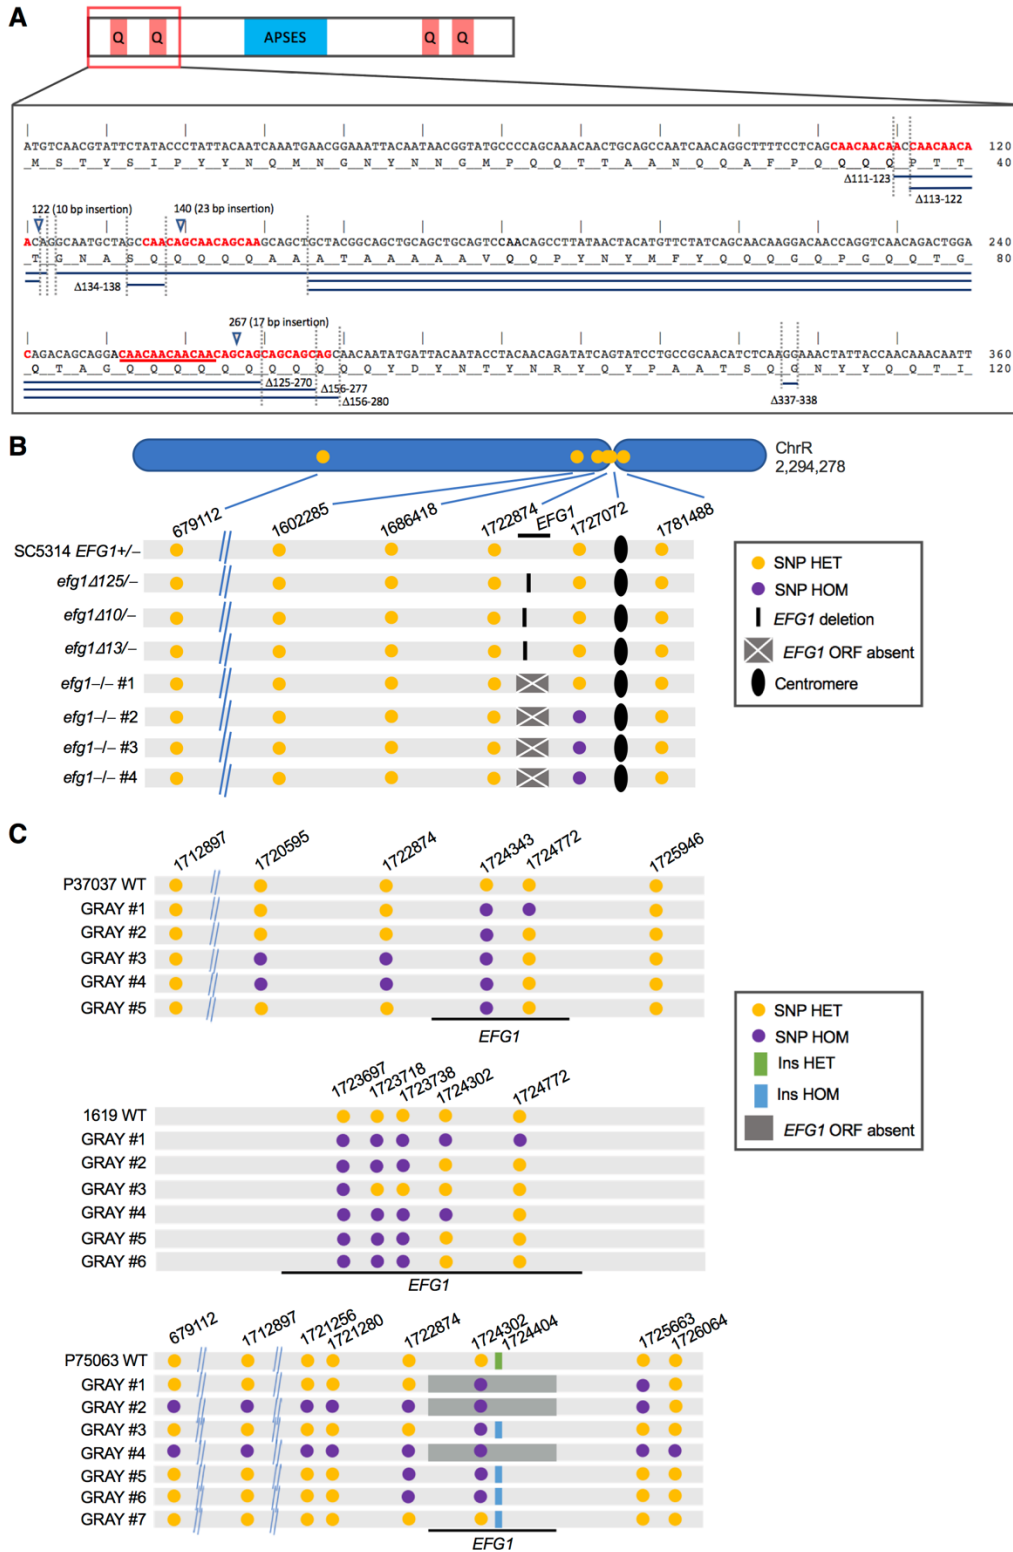

Figure S4. Summary of *de novo* mutations and gene conversion tracts in gray cells.

Related to Figure 3.

(A) *De novo* mutations arising in *EFGI* in Figure 2A are summarized here. Several repetitive sequences that are repeatedly mutated are highlighted in red.

(B) Summary of heterozygous positions along Chromosome R examined by SNP-RFLP analysis in SC5314. The parental *EFGI* hemizygous strain (*EFGI*<sup>+/-</sup>) is heterozygous for 6 SNPs (nucleotide positions indicated) and 7 independently formed gray lineages were evaluated for heterozygosity at each of these positions. *EFGI* and *CENR* are located at 1,723,589-1,725,166 and 1,743,190-1,747,664, respectively.

(C) Heterozygous positions on Chromosome R examined by SNP-RFLP analysis in three clinical isolates. The intact *EFGI* allele in the parental isolates was tagged with GFP. *EFGI* ORF absent (gray box) indicates that no PCR fragment was amplified by primers that include the GFP tag. The P37037 strain was analyzed at 6 heterozygous SNP positions. Position 1724343 is the G252D mutation, which was defined by both Sanger sequencing and SNP-RFLP in the gray cells. Strain 1619 was analyzed at only 4 SNP positions (as much of Chr R was homozygous). Position 1723697 is the Q37\* mutation, which was defined by Sanger sequencing. P75063 was analyzed at 8 SNPs along Chr R. The insertion (ins) was defined by Sanger sequencing.

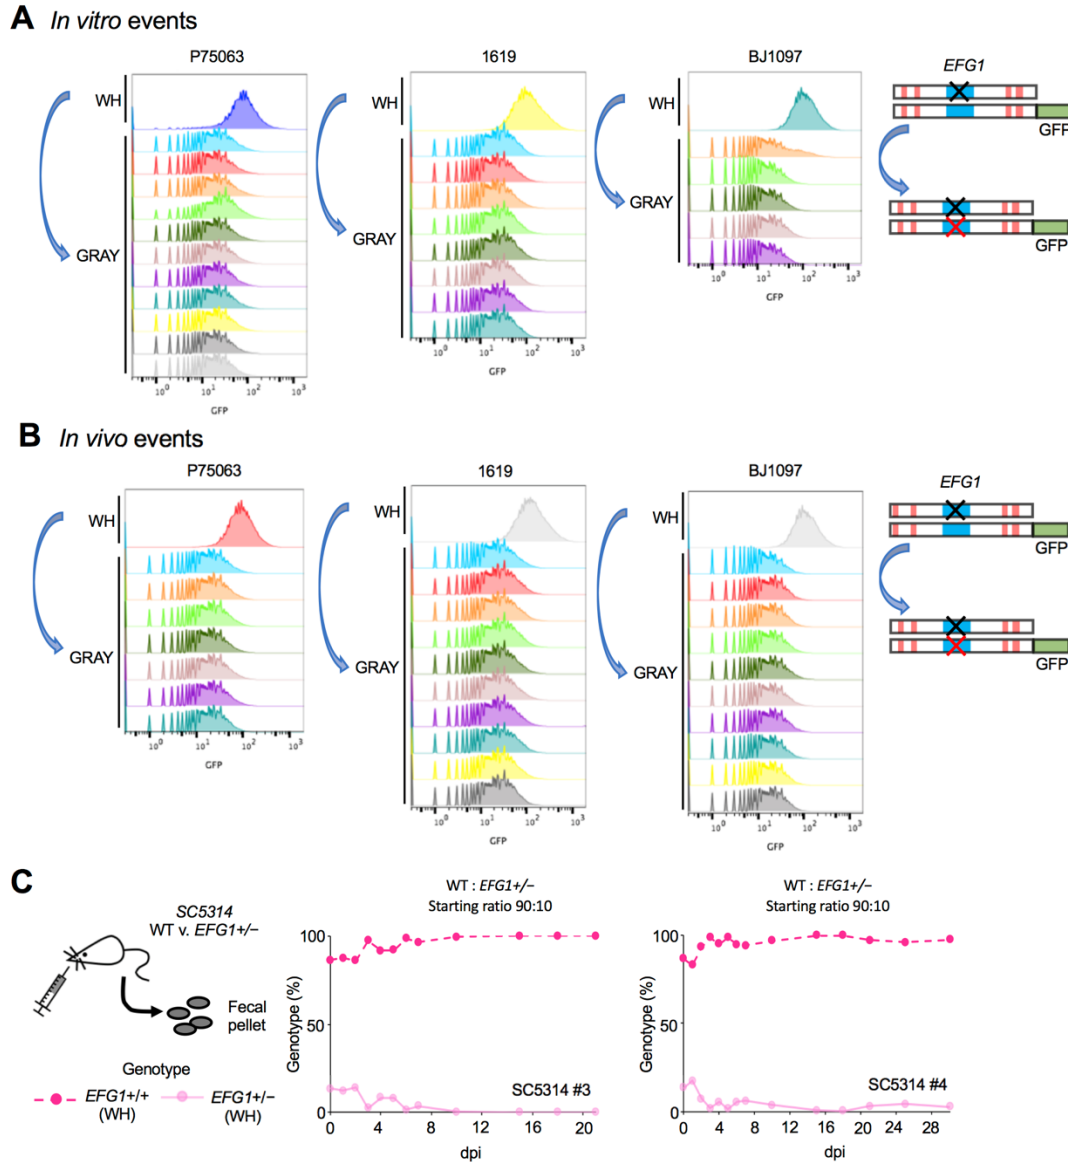

**Figure S5. Loss of *EFG1* expression upon white-to-gray switching and competition between wildtype and *EFG1*<sup>+/-</sup> strains in the GI tract. Related to Figures 3 and 4.**

(A) *EFG1* expression was monitored by flow cytometry prior to and after white-to-gray switching. The intact *EFG1* allele in *EFG1*<sup>+/-</sup> strains was expressed as a GFP fusion protein in isolates P75063, 1619 and BJ1097. Following independent white-to-gray transition events cells were analyzed by flow cytometry to examine expression of the GFP marker. GFP-labeled strains used in flow cytometry analysis: P75063, CAY9159; 1619, CAY9165; BJ1097, CAY9195.

(B) Experiments were performed as in (A) for cells from gray colonies recovered from mouse fecal samples.

(C) Competition between SC5314 *EFGI*<sup>+/+</sup> and *EFGI*<sup>+/-</sup> cells (strains CAY8282 and 7768) in the mouse GI tract. Isolates were inoculated at a 90:10 ratio. Genotype was determined by the NAT<sup>R</sup>:NAT<sup>S</sup> ratio in cells recovered from fecal samples. Gray cells emerged in two of four mice infected with this strain combination (see Figure 4D), while the other two mice lost the *EFGI*<sup>+/-</sup> cells or maintained a low population of *EFGI*<sup>+/-</sup> cells. Mice were housed separately



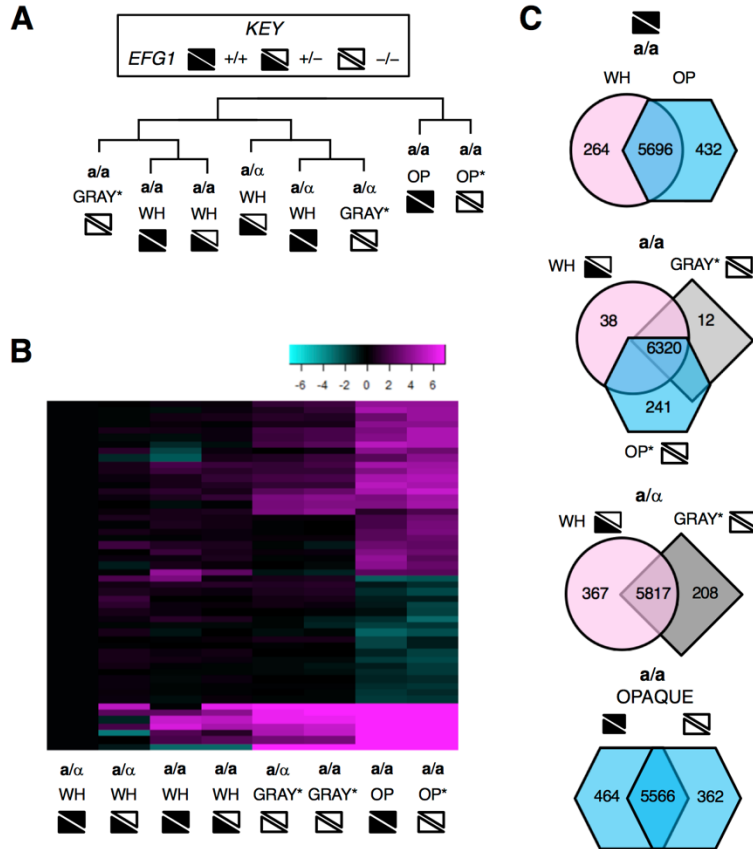

**Figure S6. Transcriptional profiles of cells in different states and genetic backgrounds.**

**Related to Figure 1.**

(A) Hierarchical clustering of RNA-Seq profiles for white, gray and opaque cells with different *MTL* and *EFG1* configurations. Asterisks indicate gray/opaque cells that arose from *EFG1* hemizygous parental cells and are *efg1* null.

(B) Heatmap of RNA-Seq data shows significant differential gene expression relative to *MTL a/a EFG1<sup>+/+</sup>* cells (>2-fold expression change,  $q < 0.05$ ). Scale bar represents log base 2 values.

(C) Venn diagram comparing gene expression between cells in different phenotypic states. Numbers indicate differentially expressed genes (>2-fold expression change,  $q < 0.05$ ).

Strains used are SC5314 derivatives: *MTL a/a EFG1<sup>+/+</sup>*; RBY717, *MTL a/a EFG1<sup>+/-</sup>*; CAY6970, *MTL a/ $\alpha$  EFG1<sup>+/+</sup>*; SN87, *MTL a/ $\alpha$  EFG1<sup>+/-</sup>*; CAY7064.

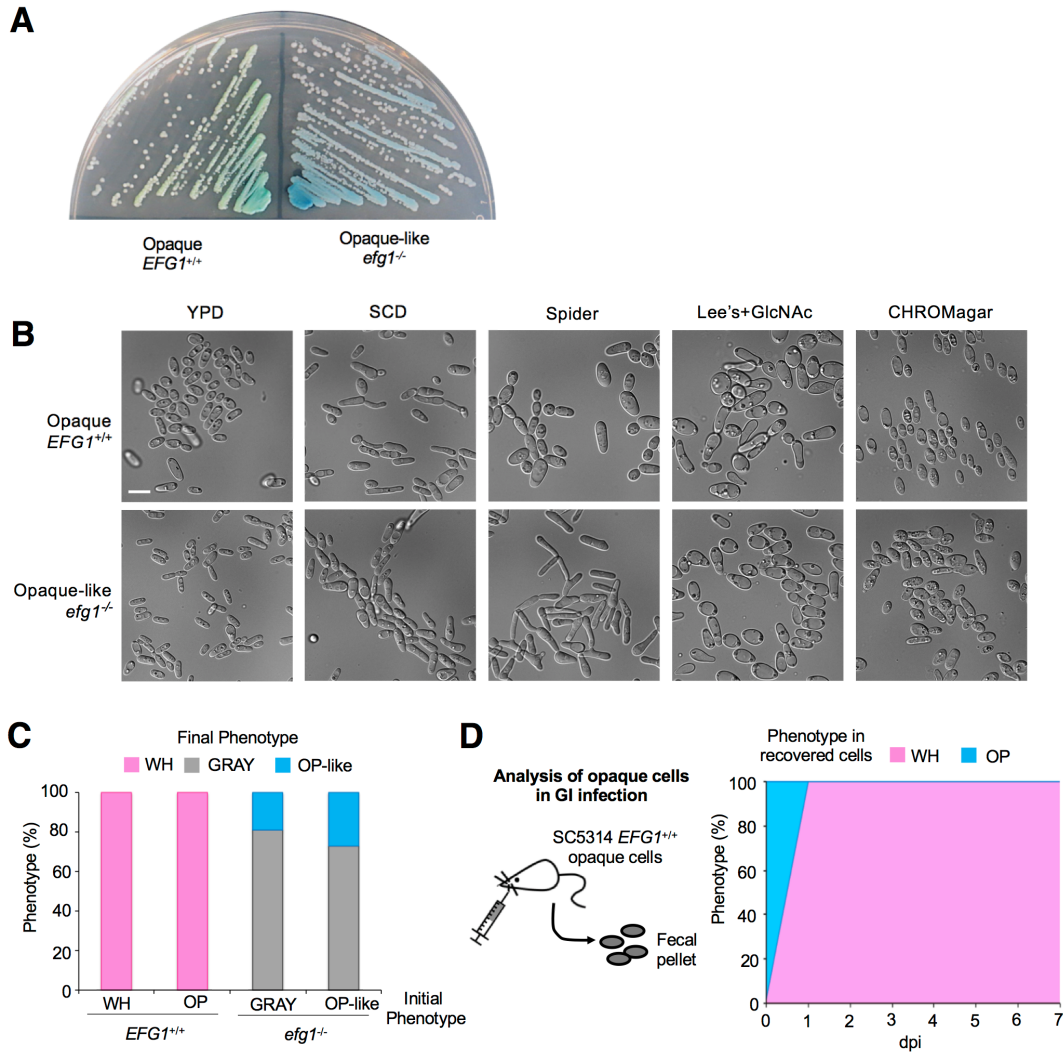

**Figure S7. Comparison of opaque cell phenotypes in *MTL* homozygous  $EFG1^{+/+}$  and  $efg1^{-/-}$  strains. Related to Figure 1 and 6.**

(A)  $EFG1^{+/+}$  opaque and  $efg1$  null opaque colonies show different colors on CHROMagar. Cells grown on CHROMagar at 22°C for 3 days.

(B) Morphologies of  $EFG1^{+/+}$  (RBY717) and  $efg1^{-/-}$  (derived from CAY6970) opaque cells grown on different media. Cells were grown on YPD, SCD, Spider, Lee's+GlcNAc and CHROMagar at 22°C for 5 days. Scale bar, 10  $\mu$ m.

(C) Cells in the indicated states were grown on YPD medium at 37°C for 7 days and subsequently analyzed for phenotypes by plating on CHROMagar. Strains were  $EFG1^{+/+}$

(RBY1177) and *efg1*<sup>-/-</sup> (derived from CAY6970 via an LOH at *EFG1*). The experiment was performed twice independently. Mean values are plotted.

(D) Analysis of *EFG1*<sup>+/+</sup> opaque cells in the mouse GI tract. Opaque cells (from CAY9962) were inoculated into the GI tract and cells recovered daily from fecal pellets to examine their phenotype. *n*=2 mice housed separately.
